# Supplementary figures and images for: A Tale of Two Families: Whole Genome and Segmental Duplications Underlie Glutamine Synthetase and Phosphoenolpyruvate Carboxylase Diversity in Narrow-Leafed Lupin (Lupinus angustifolius L.)
Source: MDPI journal article supplement (doi:10.3390/ijms21072580), 2020-04-08

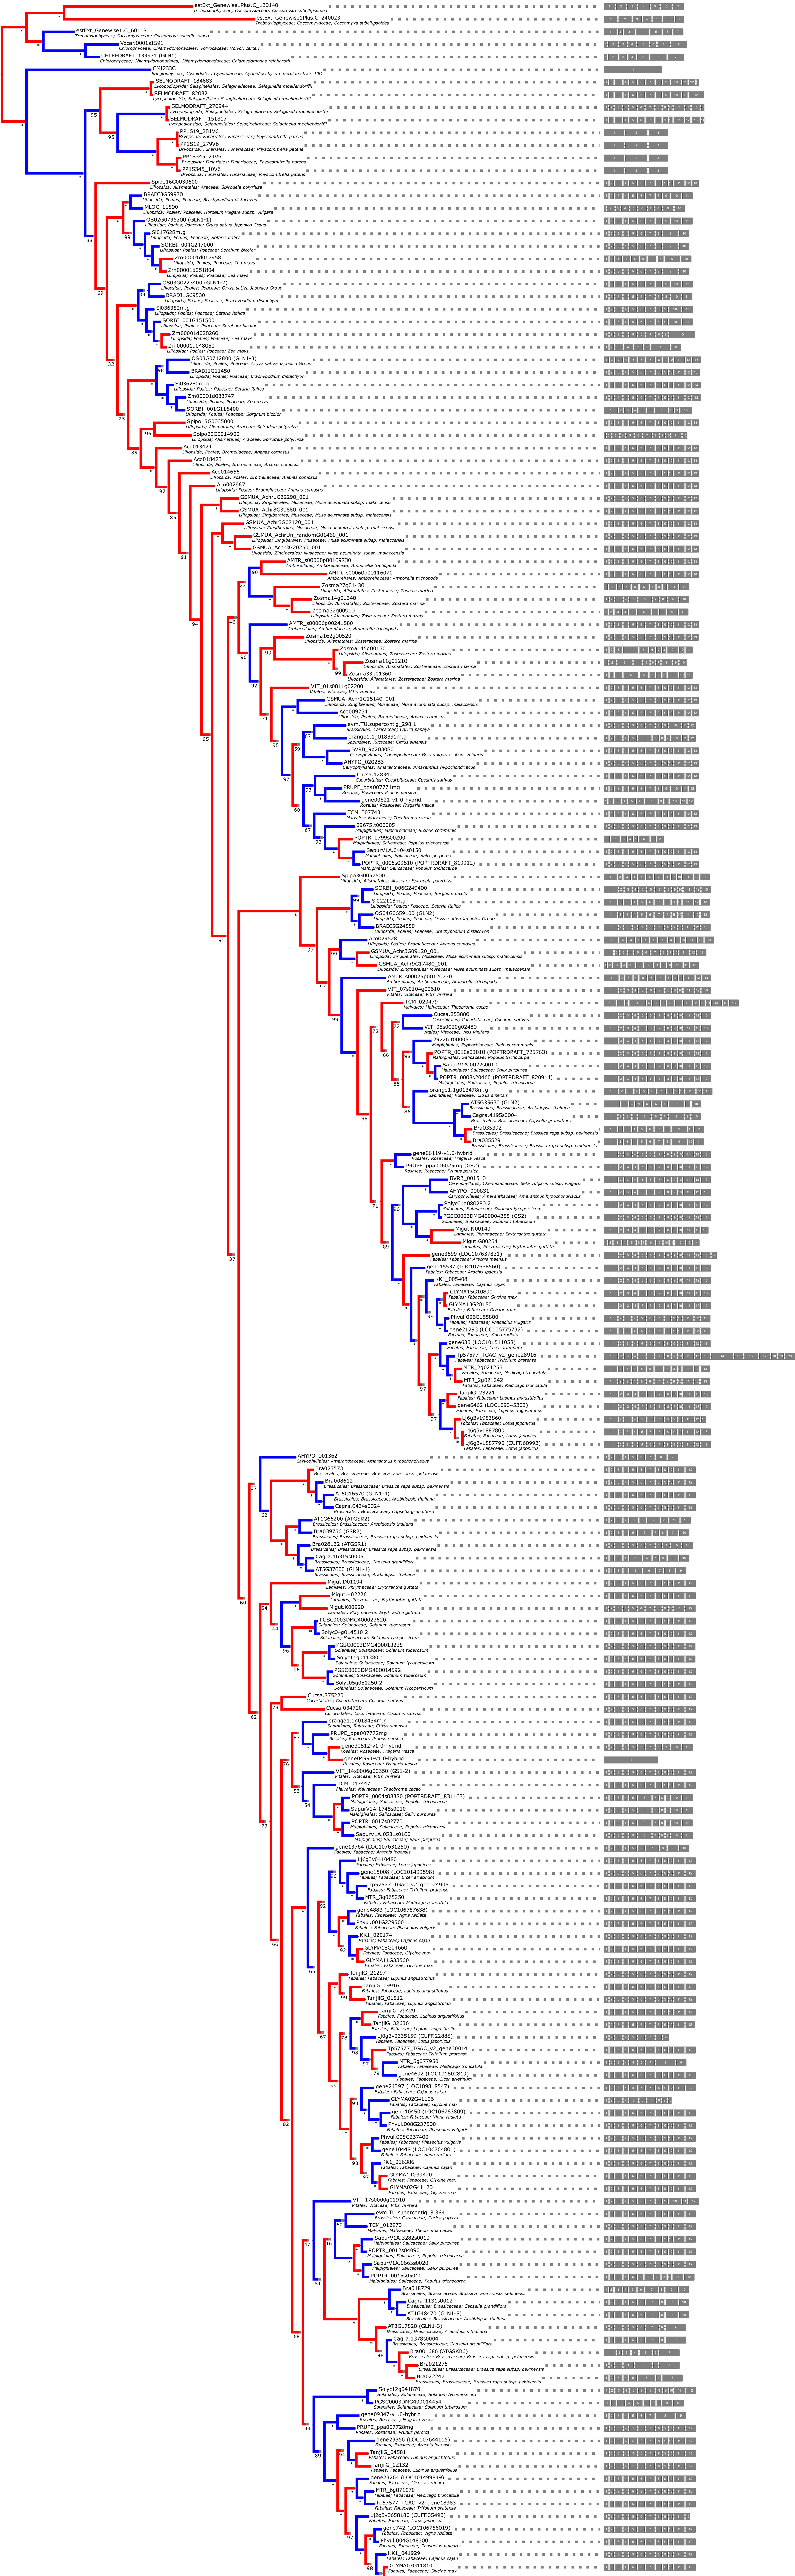

Supplement: s1 [file s1]
